# Supplementary material for: Complementary contributions of basolateral amygdala and orbitofrontal cortex to value learning under uncertainty
Source: eLife. 2017 Jul 6;6:e27483. doi: 10.7554/eLife.27483 (PMC5533586; doi:10.7554/eLife.27483)
Supplement: Figure 1—source data 1. — DOI: http://dx.doi.org/10.7554/eLife.27483.004 [file elife-27483-fig1-data1.xlsx]

## Sheet: panel 1C
Maximal changes in choice of each option in response to shifts were analyzed
with omnibus within-subject ANOVA with shift type (HV, LV; upshift, downshift)
and shift phase (pre-baseline, shift, post-baseline) as within-subject factors.
n=8
Tests of Within-Subjects Effects
Source	Type III Sum of Squares	df	Mean Square	F	Sig.
shift_type	0.802	3,21	0.267	3.122	0.048
shift_phase	0.074	2,14	0.037	1.927	0.182
shift_type * shift_phase	1.264	6,42	0.211	16.412	0.0001
Summary data:
shift_type	shift_phase	Mean	Std. Error	95% Confidence Interval
				Lower Bound	Upper Bound
HV upshift	pre-baseline	0.498	0.071	0.33	0.665
	shift_phase	0.911	0.021	0.861	0.961
	post-baseline	0.543	0.039	0.451	0.634
LV upshift	pre-baseline	0.438	0.068	0.277	0.598
	shift_phase	0.646	0.053	0.522	0.771
	post-baseline	0.503	0.061	0.358	0.647
HV downshift	pre-baseline	0.64	0.071	0.472	0.808
	shift_phase	0.505	0.063	0.357	0.653
	post-baseline	0.616	0.092	0.398	0.834
LV downshift	pre-baseline	0.49	0.073	0.318	0.662
	shift_phase	0.26	0.06	0.118	0.402
	post-baseline	0.458	0.071	0.29	0.625
	HV upshift			LV upshift			HV downshift			LV downshift
Individual data	pre-baseline	shift_phase	post-baseline	pre-baseline	shift_phase	post-baseline	pre-baseline	shift_phase	post-baseline	pre-baseline	shift_phase	post-baseline
	0.66	0.78	0.51	0.46	0.73	0.34	0.68	0.37	0.54	0.49	0.17	0.42
	0.54	0.92	0.38	0.62	0.78	0.71	0.29	0.25	0.17	0.73	0.35	0.46
	0.77	0.94	0.49	0.51	0.66	0.46	0.68	0.61	0.91	0.09	0.02	0.23
	0.44	0.89	0.69	0.61	0.7	0.56	0.62	0.42	0.73	0.31	0.11	0.38
	0.68	0.95	0.6	0.4	0.79	0.54	0.7	0.63	0.68	0.59	0.27	0.3
	0.28	0.96	0.47	0.04	0.59	0.65	0.91	0.75	0.96	0.65	0.5	0.72
	0.41	0.96	0.69	0.31	0.33	0.18	0.82	0.65	0.53	0.47	0.19	0.35
	0.2	0.89	0.51	0.55	0.59	0.58	0.42	0.36	0.41	0.59	0.47	0.8

## Sheet: panel 1D
The number of initiation omissions (i.e., failure to respond to the central cue presented at the beginning of each trial within 40s)
was analyzed with omnibus ANOVA with reward conditions (stable, upshift, and downshift collapsed across HV and LV options) as within-subject factor.
Source	Type III Sum of Squares	df	Mean Square	F	Sig.
reward_conditions	29.928	1.09,7.61	27.529	16.772	0.003
Summary statistics
reward_conditions	Mean	Std. Error	95% Confidence Interval
			Lower Bound	Upper Bound
downshift	3.773	0.823	1.827	5.719
stable	1.872	0.425	0.867	2.876
upshift	1.119	0.326	0.348	1.891
Individual data
downshift	stable	upshift
4.7	2.18	2.22
8.11	4.5	2.86
5.25	1.86	0.4
1.78	0.71	0.5
4.44	1.94	0.5
3	1.91	1.1
1.1	0.88	0.5
1.8	1	0.88
