# Supplementary material for: Complementary contributions of basolateral amygdala and orbitofrontal cortex to value learning under uncertainty
Source: eLife. 2017 Jul 6;6:e27483. doi: 10.7554/eLife.27483 (PMC5533586; doi:10.7554/eLife.27483)
Supplement: Figure 2—source data 1. — DOI: http://dx.doi.org/10.7554/eLife.27483.008 [file elife-27483-fig2-data1.xlsx]

## Sheet: GluN1
GluN1
	GluN1 expression was analyzed with ANOVA with brain region as within-subject
	and reward experience (HV, LV or no reward) as factor between subject factor.
Source	Type III Sum of Squares	df	Mean Square	F	Sig.
brain_region * group	2984.82	2,21	1492.41	5.291	0.014
group	1245.43	2,21	4833.55	4.084	0.032
Summary statistics
group	brain_region	Mean	Std. Error	95% Confidence Interval
				Lower Bound	Upper Bound
high variability	BLA	128.143	5.366	116.984	139.301
	OFC	94.862	5.052	84.356	105.369
low variability	BLA	118.379	5.366	107.22	129.538
	OFC	84.75	5.052	74.244	95.256
control no reward	BLA	100	5.366	88.841	111.159
	OFC	100	5.052	89.494	110.506
Individual data	BLA	OFC
	141.13	119.81	HV
	128.74	99.28	HV
	123.24	88.9	HV
	112.13	100.67	HV
	142.28	83.97	HV
	118.59	91	HV
	137.4	78.72	HV
	121.63	96.54	HV
	115.44	88.11	LV
	106.12	94.21	LV
	119.27	53.98	LV
	127.41	70.76	LV
	126.11	69.55	LV
	115.66	106.95	LV
	102.67	91.96	LV
	134.35	102.49	LV
	101.15	107.75	no reward
	77.64	108.16	no reward
	130.43	81.36	no reward
	76.98	102.98	no reward
	78.05	97.75	no reward
	119.2	91.69	no reward
	97.96	116.02	no reward
	118.6	94.29	no reward

## Sheet: Gephyrin
Gephyrin
		Gephyrin expression was analyzed with ANOVA with brain region as within-subject
		and reward experience (HV, LV or no reward) as factor between subject factor.
Source	Type III Sum of Squares	df	Mean Square	F	Sig.
brain_region * group	25171.4	2,12	12585.7	41.863	0.0001
group	9667.09	2,12	4833.55	6.002	0.016
Summary statistics
group	brain_region	Mean	Std. Error	95% Confidence Interval
				Lower Bound	Upper Bound
high variability	BLA	213.202	13.234	188.368	246.036
	OFC	75.392	6.787	60.604	90.18
low variability	BLA	179.899	13.234	152.463	210.131
	OFC	74.986	6.787	60.198	89.774
control no reward	BLA	100	13.234	76.241	133.909
	OFC	100	6.787	85.212	114.788
Individual data	BLA	OFC
	235.05	94.13	HV
	190.39	67.89	HV
	200.32	70.88	HV
	198.09	70.49	HV
	262.16	73.57	HV
	225.22	NaN	HV
	193.8	NaN	HV
	200.59	NaN	HV
	195.27	74.37	LV
	188.07	78.89	LV
	152.93	59.83	LV
	183.9	83.75	LV
	186.32	78.09	LV
	154.71	NaN	LV
	184.11	NaN	LV
	193.88	NaN	LV
	141.32	138.18	no reward
	132.71	95.78	no reward
	122.57	86.5	no reward
	68.05	97.19	no reward
	60.73	82.34	no reward
	94.56	NaN	no reward
	86.25	NaN	no reward
	93.81	NaN	no reward
