# Supplementary material for: Complementary contributions of basolateral amygdala and orbitofrontal cortex to value learning under uncertainty
Source: eLife. 2017 Jul 6;6:e27483. doi: 10.7554/eLife.27483 (PMC5533586; doi:10.7554/eLife.27483)
Supplement: Figure 4—source data 1. — DOI: http://dx.doi.org/10.7554/eLife.27483.011 [file elife-27483-fig4-data1.xlsx]

## Sheet: 4A
Preference change
An omnibus ANOVA with shift type as within- and experimental group (sham, BLA vs OFC lesion) as between-subject factors was used to compare the maximal changes in option preference.
Source	Type III Sum of Squares	df	Mean Square	F	Sig.
shift_type * group	0.757	6,63	0.126	9.472	0.0001
group	0.209	2,21	0.105	11.193	0.0001
Summary statistics
group	shift_type	Mean	Std. Error	95% Confidence Interval
				Lower Bound	Upper Bound
sham	HV upshift	0.43	0.036	0.356	0.504
	HV downshift	-0.13	0.03	-0.193	-0.067
	LV upshift	0.193	0.053	0.081	0.304
	LV downshift	-0.213	0.034	-0.282	-0.143
BLA	HV upshift	0.159	0.036	0.084	0.233
	HV downshift	-0.338	0.03	-0.4	-0.275
	LV upshift	0.246	0.053	0.135	0.357
	LV downshift	-0.243	0.034	-0.312	-0.173
OFC	HV upshift	0.256	0.036	0.182	0.331
	HV downshift	-0.094	0.03	-0.156	-0.031
	LV upshift	0.004	0.053	-0.107	0.115
	LV downshift	-0.074	0.034	-0.144	-0.004
Individual data
	HV upshift	HV downshift	LV upshift	LV downshift
sham	0.32	-0.11	0.17	-0.22
sham	0.36	-0.14	0.16	-0.38
sham	0.37	-0.07	0.13	-0.17
sham	0.45	-0.22	0.16	-0.22
sham	0.31	-0.11	0.29	-0.28
sham	0.59	-0.16	0.35	-0.13
sham	0.55	-0.07	0.12	-0.18
sham	0.49	-0.16	0.16	-0.12
BLA	0.1	-0.27	0.1	-0.37
BLA	0.15	-0.39	0.77	-0.24
BLA	0.13	-0.38	0.34	-0.41
BLA	0.12	-0.22	0.14	-0.35
BLA	0.16	-0.19	0.06	-0.13
BLA	0.24	-0.56	0.14	-0.16
BLA	0.17	-0.35	0.26	-0.17
BLA	0.2	-0.34	0.16	-0.11
OFC	0.1	-0.05	0.12	-0.05
OFC	0.22	-0.05	-0.09	0.09
OFC	0.29	-0.02	-0.14	-0.13
OFC	0.21	-0.02	0.11	-0.08
OFC	0.14	-0.07	0.02	-0.1
OFC	0.2	-0.14	-0.03	-0.15
OFC	0.48	-0.2	0.08	-0.05
OFC	0.42	-0.2	-0.04	-0.12

## Sheet: 4B
Win-stay/Lose-shift scores
were subjected to ANOVA with strategy as within-subject and experimental group as between-subject factors.
Source	Type III Sum of Squares	df	Mean Square	F	Sig.
strategy * group	0.416	6,63	0.069	9.912	0.0001
Summary statistics
group	strategy	Mean	Std. Error	95% Confidence Interval
				Lower Bound	Upper Bound
saline	Win-stay, expected	0.161	0.022	0.116	0.207
	Win-stay, unexpected	0.606	0.043	0.517	0.695
	Lose-shift, expected	0.15	0.017	0.114	0.186
	Lose-shift, unexpected	0.441	0.033	0.373	0.509
BLA	Win-stay, expected	0.135	0.022	0.089	0.181
	Win-stay, unexpected	0.329	0.043	0.24	0.418
	Lose-shift, expected	0.188	0.017	0.151	0.224
	Lose-shift, unexpected	0.353	0.033	0.285	0.42
OFC	Win-stay, expected	0.349	0.022	0.303	0.394
	Win-stay, unexpected	0.46	0.043	0.371	0.549
	Lose-shift, expected	0.38	0.017	0.344	0.416
	Lose-shift, unexpected	0.443	0.033	0.375	0.51
Individual data	Win-stay, expected	Win-stay, unexpected	Lose-shift, expected	Lose-shift, unexpected
sham	0.24	0.76	0.12	0.45
sham	0.18	0.51	0.12	0.56
sham	0.2	0.57	0.18	0.54
sham	0.09	0.38	0.12	0.5
sham	0.15	0.68	0.14	0.39
sham	0.13	0.64	0.19	0.4
sham	0.09	0.51	0.2	0.31
sham	0.21	0.8	0.13	0.38
BLA	0.08	0.32	0.2	0.25
BLA	0.16	0.31	0.14	0.2
BLA	0.09	0.37	0.17	0.44
BLA	0.15	0.29	0.12	0.28
BLA	0.21	0.32	0.24	0.46
BLA	0.17	0.2	0.25	0.37
BLA	0.12	0.38	0.17	0.39
BLA	0.1	0.44	0.21	0.43
OFC	0.45	0.64	0.36	0.42
OFC	0.32	0.67	0.28	0.54
OFC	0.45	0.36	0.49	0.34
OFC	0.36	0.46	0.32	0.41
OFC	0.27	0.39	0.39	0.35
OFC	0.34	0.37	0.41	0.59
OFC	0.22	0.28	0.39	0.38
OFC	0.38	0.51	0.4	0.51

## Sheet: 4C,D
We subjected the session-by-session data to an omnibus ANOVA with testing session
and shift type as within- and experimental group as between subject factors.
Source	Type III Sum of Squares	df	Mean Square	F	Sig.
shift_type * shift_session * group	0.297	8.734,91.71	0.034	8.418	0.002
Summary statistics
group	shift_type	shift_session	Mean	Std. Error	95% Confidence Interval
					Lower Bound	Upper Bound
sham	HV upshift	1	0.179	0.016	0.145	0.212
		2	0.261	0.025	0.209	0.313
		3	0.326	0.025	0.274	0.379
		4	0.363	0.034	0.292	0.433
		5	0.42	0.034	0.349	0.491
	HV downshift	1	-0.084	0.013	-0.111	-0.056
		2	-0.094	0.022	-0.139	-0.048
		3	-0.11	0.024	-0.159	-0.061
		4	-0.111	0.028	-0.169	-0.054
		5	-0.13	0.03	-0.193	-0.067
	LV upshift	1	0.063	0.023	0.014	0.111
		2	0.091	0.027	0.034	0.148
		3	0.13	0.037	0.054	0.206
		4	0.155	0.039	0.074	0.236
		5	0.193	0.053	0.081	0.304
	LV downshift	1	-0.07	0.016	-0.103	-0.037
		2	-0.101	0.021	-0.146	-0.057
		3	-0.148	0.026	-0.203	-0.092
		4	-0.178	0.03	-0.239	-0.116
		5	-0.213	0.034	-0.282	-0.143
BLA	HV upshift	1	0.039	0.016	0.005	0.072
		2	0.065	0.025	0.013	0.117
		3	0.104	0.025	0.051	0.156
		4	0.126	0.034	0.055	0.197
		5	0.156	0.034	0.085	0.228
	HV downshift	1	-0.061	0.013	-0.089	-0.034
		2	-0.101	0.022	-0.147	-0.056
		3	-0.191	0.024	-0.241	-0.142
		4	-0.234	0.028	-0.291	-0.176
		5	-0.338	0.03	-0.4	-0.275
	LV upshift	1	0.058	0.023	0.009	0.106
		2	0.096	0.027	0.039	0.153
		3	0.154	0.037	0.077	0.23
		4	0.184	0.039	0.102	0.265
		5	0.246	0.053	0.135	0.357
	LV downshift	1	-0.071	0.016	-0.105	-0.038
		2	-0.105	0.021	-0.149	-0.061
		3	-0.164	0.026	-0.219	-0.109
		4	-0.176	0.03	-0.238	-0.115
		5	-0.243	0.034	-0.312	-0.173
OFC	HV upshift	1	0.143	0.016	0.109	0.176
		2	0.18	0.025	0.128	0.232
		3	0.206	0.025	0.154	0.259
		4	0.244	0.034	0.173	0.315
		5	0.25	0.034	0.179	0.321
	HV downshift	1	-0.066	0.013	-0.094	-0.039
		2	-0.068	0.022	-0.113	-0.022
		3	-0.073	0.024	-0.122	-0.023
		4	-0.084	0.028	-0.141	-0.026
		5	-0.094	0.03	-0.156	-0.031
	LV upshift	1	-0.021	0.023	-0.069	0.027
		2	-0.028	0.027	-0.084	0.029
		3	-0.016	0.037	-0.093	0.06
		4	-0.017	0.039	-0.098	0.064
		5	0.004	0.053	-0.107	0.115
	LV downshift	1	-0.033	0.016	-0.066	0.001
		2	-0.04	0.021	-0.084	0.004
		3	-0.055	0.026	-0.11	0
		4	-0.056	0.03	-0.118	0.005
		5	-0.074	0.034	-0.143	-0.004
Individual data
	HV upshift					HV downshift					LV upshift					LV downshift
sham	1	2	3	4	5	1	2	3	4	5	1	2	3	4	5	1	2	3	4	5
sham	0.11	0.18	0.28	0.28	0.32	-0.09	-0.1	-0.1	-0.11	-0.11	0.05	0.07	0.12	0.15	0.17	-0.1	-0.12	-0.15	-0.2	-0.22
sham	0.14	0.19	0.29	0.28	0.36	-0.07	-0.09	-0.12	-0.12	-0.14	0.07	0.09	0.11	0.1	0.16	-0.09	-0.15	-0.28	-0.32	-0.38
sham	0.2	0.21	0.32	0.29	0.37	-0.05	-0.07	-0.05	-0.06	-0.07	0.06	0.05	0.09	0.11	0.13	-0.05	-0.04	-0.12	-0.14	-0.17
sham	0.22	0.3	0.36	0.4	0.43	-0.1	-0.12	-0.17	-0.2	-0.22	0.08	0.1	0.06	0.12	0.16	-0.1	-0.14	-0.09	-0.18	-0.22
sham	0.21	0.18	0.28	0.29	0.31	-0.09	-0.07	-0.11	-0.1	-0.11	0.11	0.16	0.22	0.24	0.29	-0.08	-0.16	-0.2	-0.22	-0.28
sham	0.25	0.39	0.46	0.4	0.59	-0.1	-0.11	-0.14	-0.1	-0.16	0.09	0.18	0.29	0.31	0.35	-0.05	0	-0.08	-0.1	-0.13
sham	0.18	0.4	0.26	0.47	0.53	-0.07	-0.07	-0.06	-0.05	-0.07	0.04	0.06	0.1	0.09	0.12	-0.06	-0.12	-0.16	-0.14	-0.18
BLA	0.12	0.24	0.36	0.49	0.45	-0.1	-0.12	-0.13	-0.15	-0.16	0	0.02	0.05	0.12	0.16	-0.03	-0.08	-0.1	-0.12	-0.12
BLA	0.05	0.08	0.03	0.09	0.1	-0.08	-0.09	-0.15	-0.17	-0.27	0.03	0.07	0.08	0.09	0.1	-0.12	-0.14	-0.22	-0.26	-0.37
BLA	0.06	0.07	0.1	0.11	0.15	-0.06	-0.05	-0.14	-0.2	-0.39	0.2	0.29	0.44	0.51	0.77	-0.09	-0.12	-0.2	-0.16	-0.24
BLA	0.02	0.04	0.08	0.12	0.13	-0.05	-0.22	-0.27	-0.36	-0.38	0.09	0.15	0.25	0.29	0.34	-0.14	-0.22	-0.32	-0.34	-0.41
BLA	0	0.07	0.12	0.08	0.12	-0.03	0	-0.12	-0.16	-0.22	0.04	0.06	0.06	0.1	0.14	-0.08	-0.12	-0.19	-0.25	-0.35
BLA	0.02	0.04	0.09	0.12	0.14	-0.07	-0.06	-0.1	-0.12	-0.19	0	0	0.03	0.04	0.06	-0.04	-0.08	-0.09	-0.1	-0.13
BLA	0.05	0.1	0.18	0.21	0.24	-0.14	-0.21	-0.36	-0.42	-0.56	0.06	0.06	0.11	0.14	0.14	-0.03	-0.04	-0.08	-0.1	-0.16
BLA	0.07	0.09	0.11	0.14	0.17	-0.04	-0.12	-0.19	-0.22	-0.35	0.04	0.12	0.18	0.2	0.26	-0.05	-0.08	-0.12	-0.12	-0.17
OFC	0.04	0.03	0.12	0.14	0.2	-0.02	-0.06	-0.2	-0.22	-0.34	0	0.02	0.08	0.1	0.16	-0.02	-0.04	-0.09	-0.08	-0.11
OFC	0.08	0.1	0.09	0.08	0.1	-0.05	0	-0.05	-0.04	-0.05	0.02	0	0.05	0.07	0.12	-0.01	-0.05	-0.03	0	-0.05
OFC	0.12	0.16	0.2	0.21	0.22	-0.04	-0.04	-0.03	-0.05	-0.05	-0.12	-0.13	-0.09	-0.1	-0.09	0.1	0.11	0.1	0.12	0.09
OFC	0.16	0.18	0.2	0.24	0.26	0	0	-0.01	0	-0.02	-0.15	-0.14	-0.15	-0.15	-0.14	-0.09	-0.09	-0.12	-0.12	-0.13
OFC	0.11	0.19	0.2	0.21	0.2	-0.02	0	0.01	-0.02	-0.02	0.09	0.08	0.11	0.1	0.11	-0.04	-0.05	-0.07	-0.08	-0.08
OFC	0.1	0.09	0.11	0.12	0.14	-0.06	-0.06	-0.07	-0.06	-0.07	0	0	0.01	0.02	0.02	-0.06	-0.05	-0.08	-0.09	-0.1
OFC	0.12	0.14	0.18	0.2	0.2	-0.1	-0.12	-0.1	-0.13	-0.14	-0.04	-0.03	-0.05	-0.05	-0.03	-0.08	-0.09	-0.12	-0.13	-0.15
OFC	0.21	0.26	0.4	0.48	0.46	-0.12	-0.16	-0.16	-0.18	-0.2	0.08	0.06	0.04	0.02	0.08	-0.02	-0.02	-0.02	-0.04	-0.05
	0.24	0.32	0.27	0.41	0.42	-0.14	-0.16	-0.17	-0.19	-0.2	-0.05	-0.06	-0.05	-0.05	-0.04	-0.06	-0.08	-0.1	-0.11	-0.12
