# Supplementary material for: Complementary contributions of basolateral amygdala and orbitofrontal cortex to value learning under uncertainty
Source: eLife. 2017 Jul 6;6:e27483. doi: 10.7554/eLife.27483 (PMC5533586; doi:10.7554/eLife.27483)
Supplement: Figure 4—source data 2. — DOI: http://dx.doi.org/10.7554/eLife.27483.012 [file elife-27483-fig4-data2.xlsx]

## Sheet: panel 1C
Maximal changes in choice of each option in response to shifts were analyzed
with omnibus within-subject ANOVA with shift type (HV, LV; upshift, downshift)
and shift phase (pre-baseline, shift, post-baseline) as within-subject factors.
n=24 (n=8 per group)
Tests of Within-Subjects Effects
Source	Type III Sum of Squares	df	Mean Square	F	Sig.
shift_type * shift_phase	0.574	6.9,72.5	0.083	7.409	0.0001
Summary data:
		sham				BLA lesion				OFC lesion
shift_type	shift_phase	Mean	Std. Error	95% Confidence Interval		Mean	Std. Error	95% Confidence Interval		Mean	Std. Error	95% Confidence Interval
				Lower Bound	Upper Bound			Lower Bound	Upper Bound			Lower Bound	Upper Bound
HV upshift	pre-baseline	0.46	0.038031	0.38091	0.53909	0.335	0.038031	0.25591	0.41409	0.36375	0.038031	0.28466	0.44284
	shift_phase	0.89	0.052739	0.780323	0.999677	0.49375	0.052739	0.384073	0.603427	0.62125	0.052739	0.511573	0.730927
	post-baseline	0.58	0.0602166	0.454773	0.705227	0.45375	0.0602166	0.328523	0.578977	0.50625	0.0602166	0.381023	0.631477
LV upshift	pre-baseline	0.3725	0.0614568	0.244694	0.500306	0.58125	0.0614568	0.453444	0.709056	0.58875	0.0614568	0.460944	0.716556
	shift_phase	0.565	0.0543303	0.452014	0.677986	0.8275	0.0543303	0.714514	0.940486	0.5925	0.0543303	0.479514	0.705486
	post-baseline	0.46	0.0374235	0.382174	0.537826	0.66	0.0374235	0.582174	0.737826	0.52125	0.0374235	0.443424	0.599076
HV downshift	pre-baseline	0.5475	0.034054	0.476681	0.618319	0.45375	0.034054	0.382931	0.524569	0.33875	0.034054	0.267931	0.409569
	shift_phase	0.4175	0.0374911	0.339533	0.495467	0.11625	0.0374911	0.0382831	0.194217	0.245	0.0374911	0.167033	0.322967
	post-baseline	0.53	0.0425315	0.441551	0.618449	0.2925	0.0425315	0.204051	0.380949	0.5025	0.0425315	0.414051	0.590949
LV downshift	pre-baseline	0.495	0.042945	0.405691	0.584309	0.7125	0.042945	0.623191	0.801809	0.61125	0.042945	0.521941	0.700559
	shift_phase	0.2825	0.0547994	0.168538	0.396462	0.47	0.0547994	0.356038	0.583962	0.5375	0.0547994	0.423538	0.651462
	post-baseline	0.49125	0.0418952	0.404124	0.578376	0.63375	0.0418952	0.546624	0.720876	0.59	0.0418952	0.502874	0.677126
	HV upshift			LV upshift			HV downshift			LV downshift
Individual data	pre-baseline	shift_phase	post-baseline	pre-baseline	shift_phase	post-baseline	pre-baseline	shift_phase	post-baseline	pre-baseline	shift_phase	post-baseline
sham	0.63	0.95	0.58	0.42	0.59	0.44	0.68	0.57	0.63	0.44	0.22	0.4
sham	0.27	0.63	0.31	0.52	0.68	0.46	0.44	0.3	0.48	0.69	0.31	0.56
sham	0.58	0.95	0.55	0.32	0.45	0.36	0.64	0.57	0.6	0.4	0.23	0.42
sham	0.46	0.91	0.48	0.55	0.71	0.58	0.42	0.2	0.46	0.61	0.39	0.55
sham	0.41	0.72	0.56	0.32	0.61	0.5	0.56	0.45	0.63	0.37	0.09	0.32
sham	0.38	0.97	0.85	0.09	0.44	0.39	0.61	0.45	0.53	0.47	0.34	0.62
sham	0.44	0.99	0.58	0.49	0.61	0.56	0.58	0.51	0.4	0.59	0.41	0.49
sham	0.51	1	0.73	0.27	0.43	0.39	0.45	0.29	0.51	0.39	0.27	0.57
BLA	0.26	0.36	0.31	0.59	0.69	0.7	0.51	0.24	0.41	0.69	0.32	0.49
BLA	0.42	0.57	0.83	0.17	0.94	0.54	0.46	0.07	0.21	0.86	0.62	0.58
BLA	0.41	0.54	0.49	0.63	0.97	0.63	0.49	0.11	0.29	0.63	0.22	0.59
BLA	0.42	0.54	0.26	0.57	0.71	0.66	0.4	0.18	0.43	0.66	0.31	0.58
BLA	0.21	0.37	0.27	0.89	0.95	0.76	0.27	0.08	0.19	0.81	0.68	0.89
BLA	0.48	0.72	0.61	0.39	0.53	0.48	0.62	0.06	0.25	0.65	0.49	0.62
BLA	0.2	0.37	0.44	0.63	0.89	0.79	0.46	0.11	0.37	0.56	0.39	0.54
BLA	0.28	0.48	0.42	0.78	0.94	0.72	0.42	0.08	0.19	0.84	0.73	0.78
OFC	0.34	0.44	0.4	0.6	0.72	0.51	0.28	0.23	0.34	0.51	0.46	0.44
OFC	0.39	0.61	0.38	0.37	0.28	0.3	0.31	0.26	0.63	0.62	0.71	0.69
OFC	0.56	0.85	0.72	0.71	0.57	0.61	0.39	0.37	0.57	0.43	0.3	0.44
OFC	0.31	0.52	0.45	0.55	0.66	0.58	0.42	0.4	0.66	0.81	0.73	0.69
OFC	0.37	0.51	0.48	0.74	0.76	0.63	0.18	0.11	0.26	0.52	0.42	0.49
OFC	0.24	0.44	0.32	0.59	0.56	0.37	0.32	0.18	0.43	0.57	0.42	0.59
OFC	0.42	0.9	0.74	0.71	0.79	0.64	0.34	0.14	0.42	0.64	0.59	0.66
OFC	0.28	0.7	0.56	0.44	0.4	0.53	0.47	0.27	0.71	0.79	0.67	0.72
