# Supplementary material for: Complementary contributions of basolateral amygdala and orbitofrontal cortex to value learning under uncertainty
Source: eLife. 2017 Jul 6;6:e27483. doi: 10.7554/eLife.27483 (PMC5533586; doi:10.7554/eLife.27483)
Supplement: Figure 6—source data 1. — DOI: http://dx.doi.org/10.7554/eLife.27483.019 [file elife-27483-fig6-data1.xlsx]

## Sheet: 6A
Baseline choice preferences were analyzed with ANOVA with time (five repeated baseline conditions separating the value shifts)
as within and lesion status (sham, BLA, OFC) as between subject factors
Source	Type III Sum of Squares	df	Mean Square	F	Sig.
time * group	0.687	4.37,45.87	0.157	8.484	0.0001
Summary statistics
group	time	Mean	Std. Error	95% Confidence Interval
				Lower Bound	Upper Bound
sham	baseline_1	0.525	0.05	0.422	0.628
	baseline_2	0.528	0.031	0.463	0.592
	baseline_3	0.546	0.051	0.441	0.652
	baseline_4	0.541	0.039	0.461	0.621
	baseline_5	0.544	0.034	0.473	0.615
BLA	baseline_1	0.261	0.05	0.158	0.365
	baseline_2	0.368	0.031	0.303	0.432
	baseline_3	0.454	0.051	0.348	0.559
	baseline_4	0.413	0.039	0.332	0.493
	baseline_5	0.244	0.034	0.173	0.315
OFC	baseline_1	0.259	0.05	0.155	0.362
	baseline_2	0.325	0.031	0.26	0.39
	baseline_3	0.429	0.051	0.323	0.534
	baseline_4	0.485	0.039	0.405	0.565
	baseline_5	0.654	0.034	0.583	0.725
Individual data
	baseline_1	baseline_2	baseline_3	baseline_4	baseline_5
sham	0.68	0.63	0.58	0.56	0.6
sham	0.27	0.31	0.44	0.48	0.54
sham	0.68	0.64	0.6	0.58	0.55
sham	0.39	0.45	0.42	0.46	0.48
sham	0.41	0.56	0.63	0.68	0.5
sham	0.91	0.61	0.53	0.38	0.85
sham	0.41	0.51	0.44	0.58	0.4
sham	0.45	0.51	0.73	0.61	0.43
BLA	0.26	0.31	0.51	0.41	0.3
BLA	0.14	0.42	0.83	0.46	0.21
BLA	0.37	0.37	0.41	0.49	0.29
BLA	0.4	0.43	0.34	0.42	0.26
BLA	0.21	0.27	0.19	0.11	0.24
BLA	0.35	0.48	0.61	0.62	0.25
BLA	0.2	0.44	0.46	0.37	0.21
BLA	0.16	0.22	0.28	0.42	0.19
OFC	0.28	0.34	0.4	0.49	0.56
OFC	0.39	0.38	0.31	0.63	0.7
OFC	0.29	0.39	0.57	0.56	0.72
OFC	0.19	0.27	0.45	0.42	0.66
OFC	0.18	0.26	0.37	0.48	0.51
OFC	0.24	0.32	0.43	0.41	0.63
OFC	0.29	0.36	0.34	0.42	0.74
OFC	0.21	0.28	0.56	0.47	0.71
